# Supplementary material for: Solvent-free ketone hydrogenations catalyzed by molybdenum complexesElectronic supplementary information (ESI) available: additional spectroscopic data and description of the synthetic procedures. See http://www.rsc.org/suppdata/cc/b4/b401760a/
Source: Royal Society of Chemistry journal article supplement (doi:10.1039/b401760a), 2004-01-01
Supplement: b401760a.doc [file b401760a.doc]

Supporting Information

for

Solvent-free ketone hydrogenations catalyzed

by molybdenum complexes

Barbara F. M. Kimmich, Paul J. Fagan, Elisabeth Hauptman, and R. Morris Bullock*

**General Methods.** All manipulations were carried out under an argon atmosphere using standard Schlenk or vacuum line techniques or in a dry box. THF, Et2O, toluene, hexane and pentane were distilled from Na/benzopheneone, and CH2Cl2 was distilled from P2O5. Mo(CO)3(diglyme),1 Ph3C+BAr'4 –,2 spiro[2.4]hepta-4,6-diene,3 LiC5H4(CH2)2PR2 (R = Ph, tBu)4,5 were prepared following literature methods. Ph3C+BF4 – and Ph3C+PF6 –were purchased from Aldrich and purified by recrystallization from CH2Cl2/Et2O. Elemental analyses were carried out by Schwarzkopf Microanalytical Laboratory (Woodside, NY).

**Preparation of lithium [2-(dicyclohexylphosphino)ethyl] cyclopentadienide**. This synthesis of LiC5H4(CH2)2PCy2 is based on the previously reported procedure4 for synthesis of LiC5H4(CH2)2PPh2. Freshly prepared LiPCy2 (3.00 g 14.7 mmol; prepared from Cy2PH and *n*-BuLi in hexane at room temperature) was dissolved in freshly distilled THF (120 mL), and spiro[2.4]hepta-4,6-diene3 (1.52 mL, 1.36 g, 1 equiv.) was added. The solution was refluxed for 6 hrs, then cooled to room temperature. The solvent was evaporated and pentane (100 mL) was added. The precipitate was collected by filtration and washed with pentane (4 x 10 mL). The off-white solid was dried under vacuum overnight yielding 3.14 g (10.6 mmol, 71.9%) of LiC5H4(CH2)2PCy2 (95% purity by 1H and 31P NMR). 1H NMR (300 MHz, THF-d8):  1.23-1.78 (m, 24H, PCy2 and CH2), 2.62 (m, 2H, CH2), 5.51(AA’BB’ system, 4H, C5H4). 31P{1H} NMR (121.9 MHz, THF-d8):  –6.5.

**Preparation of HMo(CO)2[5:1-C5H4(CH2)2PCy2].** A solution of LiC5H4(CH2)2PCy2 (733.8 mg, 2.48 mmol) in THF (10 mL) was added to a solution of Mo(CO)3(diglyme) (777.6 mg, 2.48 mmol, 1.00 equiv) in THF (15 mL). The yellow solution was stirred for 30 min at room temperature to give Li{Mo(CO)3[5-C5H4(CH2)2PCy2}. HOAc (180 L, 3.14 mmol, 1.27 equiv.) was added, and the color of the solution lightened to a pale yellow, and salt formation was observed. The solvent was evaporated and the residue was extracted with toluene (25 mL ). The reaction mixture was filtered, and the toluene was evaporated. Recrystallization from a mixture of toluene, THF and pentane at –30°C produced HMo(CO)2[5:1-C5H4(CH2)2PCy2] as pale yellow solid (557.0 mg, 1.26 mmol, 51 % yield). The NMR assignments below were determined with the help of 1H, 1H{31P}, 31P{1H}, 13C{1H}, 1H-13C HMQC and 1H-1H COSY. 1H NMR (400 MHz, CD2Cl2):  -5.81 (d, 2JPH = 26.8, 1H, MoH), 1.24-2.00 (m, 22H, Cy), 2.38 (m, 2H, PCH2), 2.47 (m, 2H, C5H4CH2), 4.96 (br, 2H, **-C5H4), 5.09 (m, 2H, **-C5H4); 31P{1H} NMR (162.0 MHz, CD2Cl2):  80.6 (br, w1/2 = 200 Hz); 13C{1H} NMR (100.6 MHz, CD2Cl2):  25.8 (br, PCH2), 26.7 (s, *m*-or *p*-Cy), 27.6 (d, 2JCP = 13 Hz, *o*-Cy), 29.0 (s, *m*- or *p*-Cy), 37.0 (d, 2JCP = 23 Hz, *ipso*-Cy), 37.3 (v br, C5H4CH2), 81.8 (s, *o*-C5H4), 87.4 (s, *m*-C5H4), 125.1 (d, 3JCP = 6 Hz, *ipso*-C5H4), 234 (v br, CO); IR (THF): (CO) = 1927 (s), 1848 (vs) cm-1; Anal. calcd for C21H31O2PMo (442.4): C, 57.02; H, 7.06; Found C, 56.92, H, 6.99.

**Crystal Structure of** **HMo(CO)2[5:1-C5H4(CH2)2PCy2].** This complex was recrystallized from CH2Cl2/hexane. Crystallographic data: 0.17  0.37  0.42 mm; MoK radiation on a Bruker SMART 1K CCD diffractometer, structure was solved by direct methods using teXsan(SIR-92) and was refined using Z program suite (Calabrese);. Refinement was by full-matrix least squares on F. monoclinic; P21/c; *a* = 8.182(1) Å, *b* = 15.618(1) Å, *c* = 15.861(1) Å, ** = 100.90(1) °; *V* = 1990.2 Å3, *Z* = 4 and **calc = 1.476 g/cm3; 2** range2.6-56.6°; psi scan; *T* = –100 °C; 12880 total reflections; *R*1 = 0.026 and Rw = 0.025 for 3015 reflections for which I≥3.0).


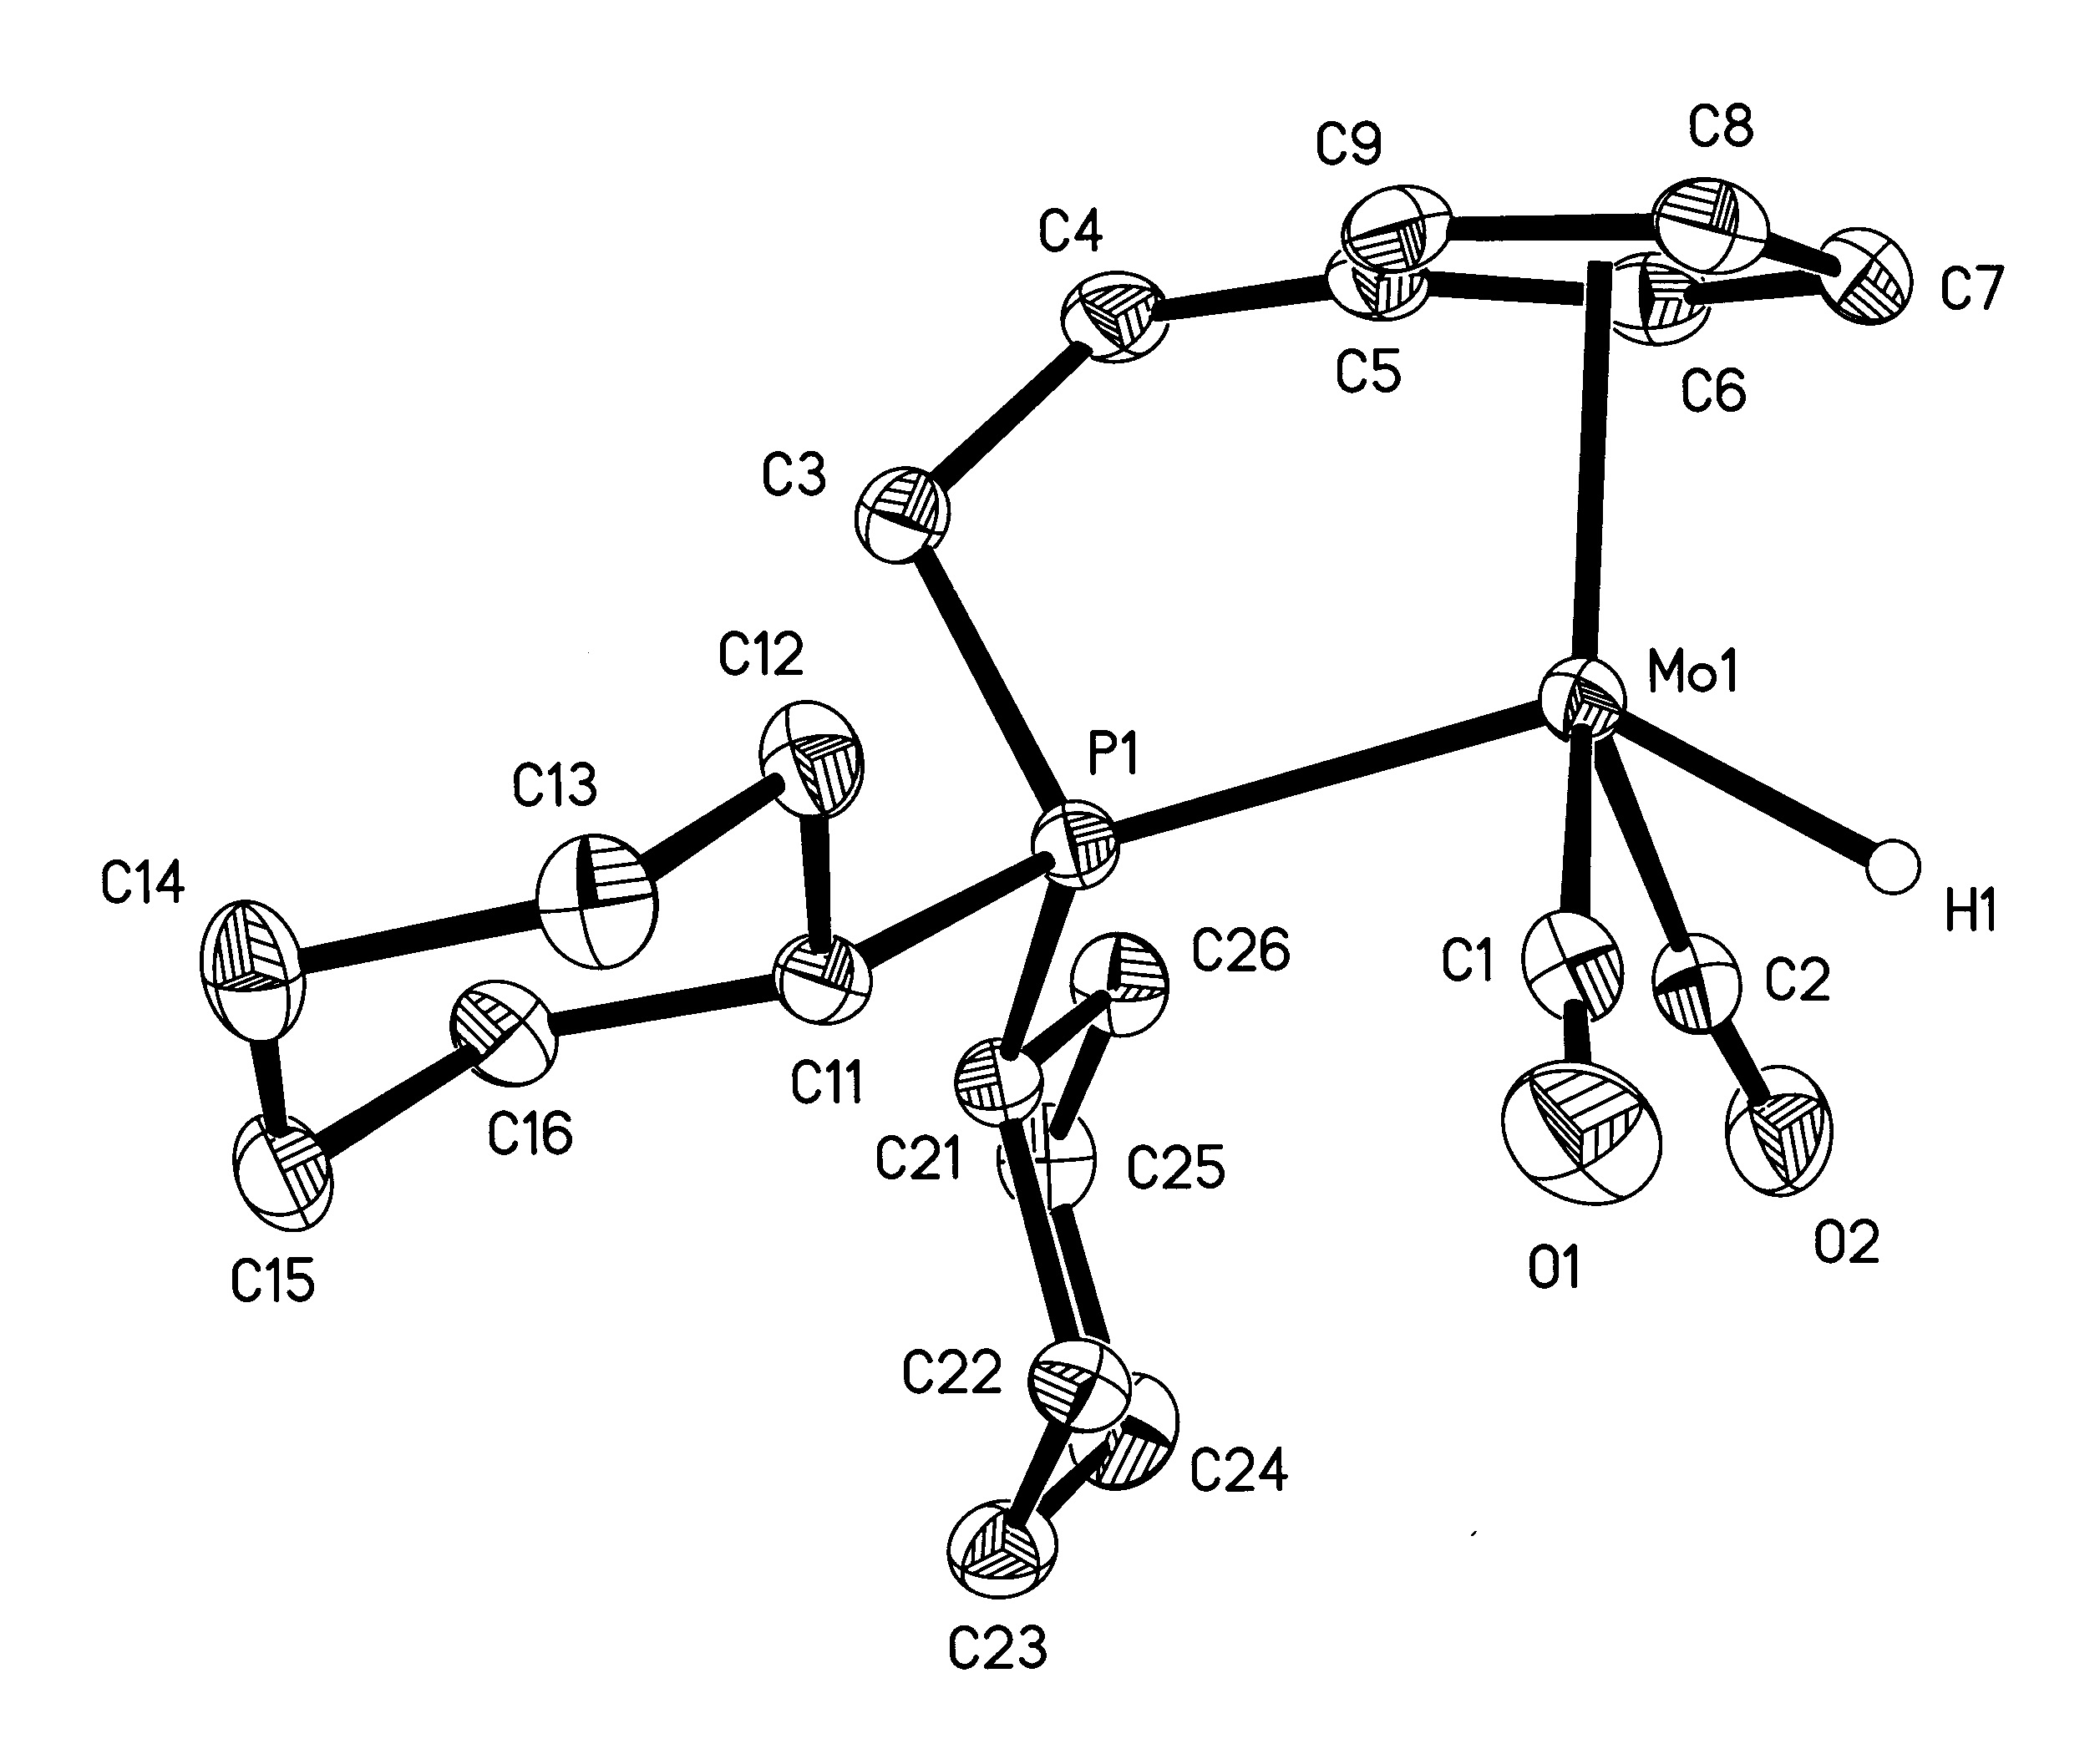


ORTEP drawing of HMo(CO)2[5:1-C5H4(CH2)2PCy2]. Selected bond lengths (Å) and angles (°):(50% probability ellipsoids) Mo(1)–P(1) 2.4664(7), Mo(1)–C(1) 1.960(3), Mo(1)–C(2) 1.955(3), Mo(1)–P(1)–C(3) 105.0(1), P(1)–C(3)–C(4) 111.7(2), C(3)–C(4)–C(5) 111.3(2). All hydrogens except H(1) were removed for clarity.

**Preparation of HMo(CO)2[5:1-C5H4(CH2)2PtBu2].** A solution of Mo(CO)3(diglyme) (793.2 mg, 2.52 mmol) in THF (10 mL) was added to a solution of LiC5H4(CH2)2PtBu2 (616.8 mg, 2.52 mmol, 1.00 equiv) in THF (10 mL). The solution was stirred for 1.5 hours at room temperature to give Li[Mo(CO)3[5-C5H4(CH2)2PtBu2}. HOAc (170 L, 2.97 mmol, 1.18 equiv.) was added. The yellow solution darkened to orange, and salt formation was observed. After 30 min at room temperature, solvent was evaporated. The residue was extracted with toluene (25 mL) and filtered. The solvent was evaporated. Recrystallization from toluene/hexane at –30°C produced HMo(CO)2[5:1-C5H4(CH2)2PtBu2] as a yellow solid (710 mg, 1.82 mmol, 72 % yield). 1H NMR (300 MHz, CD2Cl2):  -5.74 (d, 2JPH = 24.6, 1H, MoH), 1.34 (d, 3JPH = 12.9 Hz, 18 H, tBu), 2.34-2.51 (m, 4H, CH2’s), 4.96 (br, 2H, Cp), 5.07 (br, 2H, Cp); 31P{1H} NMR (121.9 MHz, CD2Cl2):  103.8 (br, w1/2 = 34 Hz); IR (THF): (CO) = 1922 (s), 1845 (vs) cm-1; Anal. Calcd. for C21H31O2PMo (442.4): C, 52.36; H, 7.17; Found C, 52.31; H, 6.97.

**Preparation of HMo(CO)2[5:1-C5H4(CH2)2PPh2**]. Mo(CO)3(diglyme) (557 mg, 1.77 mmol) and LiC5H4(CH2)2PPh2 (504 mg, 1.77 mmol, 1.00 equiv) were placed in a Schlenk flask, and THF (20 mL) was added. The solution was stirred for 2 h at room temperature, at which time the reaction was ~80% complete. The solution was refluxed for an additional 2 hours to generate Li{Mo(CO)3[5-C5H4(CH2)2PPh2]}. HOAc (100 L, 1.92 mmol, 1.08 equiv.) was added, the yellow solution lightened, and salt formation was observed. The solution was stirred for 3 hours at room temperature, and the solvent was evaporated. The residue was extracted with toluene (25 mL) and filtered. The resulting pale red solution was diluted with pentane (30 mL) and stored in a –30°C freezer. HMo[5:1-C5H4(CH2)2PPh2] crystallized as a yellow solid (230 mg, 0.530 mmol, 30 % yield). 1H NMR (300 MHz, CD2Cl2):  -5.25 (d, 2JPH= 27.6, 1H, MoH), 2.34 (dt, 2JPH= 28.1 Hz, 3JHH = 6.8 Hz, 2H, PCH2), 3.00 (“q”, 3JPH = 3JHH = 7.4 Hz, 2H, C5H4CH2); 5.10 (br, 2H, C5H4), 5.30 (br, 2H, C5H4), 7.42-7.55 (m, 10H, Ph); 31P{1H} NMR (121.9 MHz, CD2Cl2):  74.4 (br, w1/2 = 32 Hz); IR (THF): (CO) = 1939 (s), 1864 (vs) cm-1. Depending on crystallization conditions, the crystals contain up to one equiv. of toluene. The sample sent for elemental analysis was shown by 1H NMR to contain 0.2 molar equivalents of toluene. Anal. Calcd. for C21H19O2PMo • 0.2 toluene: C, 59.80; H, 4.57; Found C, 59.93, H, 4.56.

**Formation of {Mo(CO)2[5:1-C5H4(CH2)2PPh2(NCCD**3**)}BF**4**.** Ph3C+BF4 – (7.2 mg, 0.022 mmol) and HMo(CO)2[5:1-C5H4(CH2)2PPh2] (9.5 mg, 0.022 mmol) were placed in an NMR tube, and CD3CN (700 L) was added, giving a yellow-orange solution. Initially, *trans*-{Mo(CO)2[5:1-C5H4(CH2)2PPh2(NCCD3)}BF4, was the only species observed in solution. The cis isomer grew in over 24 hrs (79:21 ratio for trans:cis). After 17 days the product ratio was 74:26 for trans:cis.

*trans*-{Mo(CO)2[5:1-C5H4(CH2)2PPh2(NCCD3)}BF4: 1H NMR (300 MHz, CD3CN):  2.20 (dt, 2H, 2JHP = 30 Hz, 3JHH = 7.0 Hz, PCH2), 2.96 (dt, 2H, 3JHP = 9.6, 3JHH = 7.0, C5H4CH2), 5.49 (t, 2H, 3JHH = 2.3 Hz, C5H4), 6.08 (br t, 2H, 3JHH = 2.1 Hz, C5H4), 7.12-7.56 (m, 10H, Ph); 31P NMR (121.9 MHz, CD3CN):  70.3

*cis*-{Mo(CO)2[5:1-C5H4(CH2)2PPh2(NCCD3)}BF4: 1H NMR (300 MHz, CD3CN):  2.75 (m, 2H, CH2), 3.42 (m, 2H, CH2), 5.06 (m, 1H, C5H4), 5.40 (m, 1H, C5 H 4), 5.94 (m, 1H, C5 H 4), 6.15 (m, 1H, C5 H 4), 7.12-7.56 (m, Ph, 10H); 31P NMR (121.9 MHz, CD3CN):  64.4.

**Formation of {Mo(CO)2[5:1-C5H4(CH2)2PCy2(NCCD**3**)}BF**4. Ph3C+BF4 – (7.2 mg, 0.022 mmol) and HMo(CO)2[5:1-C5H4(CH2)2PCy2] (9.7 mg, 0.022 mmol) were placed in an NMR tube and and CD3CN (700 L) was added, giving a yellow-orange solution. Initially, a *trans:cis* ratio of 69:31 was observed in solution.

*trans*-{Mo(CO)2[5:1-C5H4(CH2)2]PCy2(NCCD3)}BF4: 1H NMR (300 MHz, CD3CN): 1.23-1.95 (m, 22H, Cy), 2.14-2.43 (m, 4H, CH2), 5.34 (t, 2H, 3JHP = 2.3 Hz, C5H4), 5.79 (m, 2H, 3JHP = 1.9 Hz, C5H4); 31P NMR (121.9 MHz, CD3CN):  75.6.

*cis*-{Mo(CO)2[5:1-C5H4(CH2)2PCy2(NCCD3)}BF4: 1H NMR (300 MHz, CD3CN):  1.23-1.95 (m, 22H, Cy), 2.01-2.87 (m, 4H, CH2), 4.91 (m, 1H, C5H4), 5.13 (m, 1H, C5H4); 5.82 (m, 1H, C5H4), 6.00 (m, 1H, C5H4); 31P NMR (121.9 MHz, CD3CN):  64.5.

**Formation of {Mo(CO)2[5:1-C5H4(CH2)2PtBu2(NCCD3)}BF4.** Ph3C+BF4 – (8.8 mg, 0.027 mmol) and HMo(CO)2[5:1-C5H4(CH2)2P tBu2] (10.4 mg, 0.027 mmol) were placed in an NMR tube and CD3CN (700 L) was added, giving an orange solution. Initially, a *trans:cis* ratio of 76:24 formed.

*trans*-{Mo(CO)2[5:1-C5H4(CH2)2PtBu2(NCCD3)}BF4: 1H NMR (300 MHz, CD3CN):  1.44 (d, 18H, 3JHP = 13.5 Hz, CH3 of tBu), 2.32-2.60 (m, 4H, CH2), 5.37 (t, 2H, 3JHP = 2.3 Hz, C5H4), 5.78 (m, 2H, C5H4); 31P NMR (121.9 MHz, CD3CN):  113.8.

*cis*-{Mo(CO)2[5:1-C5H4(CH2)2PtBu2(NCCD3)}BF4: 1H NMR (300 MHz, CD3CN):  1.32 (d, 9H, 3JHP = 12.8 Hz, CH3 of tBu), 1.39 (d, 9H, 3JHP = 13.4 Hz, CH3 of tBu), 2.3-2.8 (m, 4H, CH2), 4.89 (m, 1H, C5H4), 5.12 (m, 1H, C5H4), 5.71 (m, 1H, C5H4), 5.98 (m, 1H, C5H4); 31P NMR (121.9 MHz, CD3CN):  98.0.

**Preparation of Mo(CO)2[5:1-C5H4(CH2)2PCy2]OTf.** HMo(CO)2[5:1-C5H4(CH2)2PCy2] (201.0 mg, 0.454 mmol) was dissolved in CH2Cl2 (6 mL). HOTf (40 L, 67 mg, 0.45 mmol) was added to the solution. The pale yellow solution rapidly darkened to deep red. The solution was stirred for 30 min at room temperature. The solvent was evaporated, and the product was recrystallized from toluene at –30°C. Mo(CO)2[5:1-C5H4(CH2)2PCy2](OTf) crystallized as a red solid (165.0 mg, 0.28 mmol, 62 % yield). The isolated product is a 6:1 mixture of *cis:trans* isomers. The product ratio does not significantly change in CD2Cl2 after 2 days at room temperature. 1H NMR (300 MHz, CD2Cl2):  1.20-2.52 (m, *cis* and *trans*-CH2 and Cy), 2.69-2.85 (m, *cis-* and *trans*-CH2), 4.58 (m, 1H, *cis*-C5H4), 4.63 (m, 1H, *cis*-C5H4), 5.65 (m, 2H, *trans*-C5H4), 5.70 (m, 2H, *trans*-C5H4), 6.13 (m, 1H, *cis*-C5H4), 6.20 (m, 1H, *cis*-C5H4), 31P NMR (121.9 MHz, CD2Cl2):  66.5 (*cis*), 79.1 (*trans*). IR (THF): (CO) = 1980 (s), 1869 (s) cm‑1. Anal. calcd. for C22H30O5F3PSMo (590.45): C, 44.75, H, 5.12; found C, 44.59, H, 5.04.

**Preparation of Mo(CO)2[5:1-C5H4(CH2)2PPh2]OTf.** HMo(CO)2[5:1-C5H4(CH2)2PPh2] (29.9 mg, 6.95 x 10-5 mol) was dissolved in toluene (2 mL). HOTf (7.0 L, 7.9 x 10-5 mol, 1.1 equiv.) was added to the solution. The pale yellow solution rapidly darkened to deep purple. The solution was stirred for 30 min at room temperature. Hexane (2 mL) was added to the toluene solution and Mo(CO)2[5:1-C5H4(CH2)2PCy2](OTf) crystallized at –30°C as a purple-red solid (165.0 mg, 0.28 mmol, 62 % yield; 1.5:1 mixture of *trans:cis* isomers). The *trans:cis* ratio did not significantly change in CD2Cl2, after 18 hours at room temperature. 1H NMR (400 MHz, CD2Cl2):  2.09 (dt, 2H, 2JHP = 27.6 Hz, 3JHH = 7.0 Hz, *trans*-PCH2), 2.50-2.56 (m, 1H, *cis*-CH2), 2.72 (m, 2H, *trans*-C5H4CH2), 2.91-3.03 (m, 1H, *cis-*CH2), ), 3.36-3.45 (m, 2H, *cis*-CH2), 4.71 (m, 1H, *cis*-C5H4), 4.85 (m, 1H, *cis*-C5H4), 5.78 (m, 2H, *trans*-C5H4), 5.95 (m, 2H, *trans*-C5H4), 6.28 (m, 1H, *cis*-C5H4), 6.31 (m, 1H, *cis*-C5H4); 31P NMR (162.0 MHz, CD2Cl2):  63.3(*cis*, 39%), 74.9 (*trans*, 61%).

**Preparation of Mo(CO)2[5:1-C5H4(CH2)2PtBu2]OTf.** HMo(CO)2[5:1-C5H4(CH2)2PtBu2] (163.4 mg, 0.419 mmol) was dissolved in toluene (4 mL). HOTf (36 L, 61 mg, 0.41 mmol) was added to the solution. The pale yellow solution initially turned dark purple, then blood red. The solution was stirred for 30 min at room temperature. The product began to precipitate from the solution. The mixture was stored at –30°C overnight to complete the crystallization. Mo(CO)2[5:1-C5H4(CH2)2PtBu2](OTf) was isolated as an orange-red solid (177.5 mg, 0.33 mmol, 81% yield, >95% pure). The isolated product is a 9:1 mixture of *cis:trans* isomers. 1H NMR (400 MHz, CD2Cl2) of *cis*-isomer:  1.29 (d, 2JHP = 13.2 Hz, CH3 of tBu), 1.43 (d, 2JHP = 13.0 Hz, CH3 of tBu), 2.56-2.88 (m, CH2’s), 4.53 (m, 1H, C5H4), 4.66 (m, 1H, C5H4), 5.97 (m, 1H, C5H4), 6.11 (m, 1H, C5H4); 1H NMR (400 MHz, CD2Cl2) of *trans* isomer:  1.45 (overlapping with cis, CH3 of tBu), 1.95 (“q”, 3JPH= 3JHH= 7.6 Hz, 2H, C5H4CH2), 2.26 (dt, 2JPH= 23.8 Hz, 3JHH= 7.2 Hz, 2H, PCH2) 5.71 (m, 4H, C5H4); 31P NMR (162.0 MHz, CD2Cl2):  114.1 (trans), 94.4 (cis); IR (THF): (CO) = 1992 (s), 1904 (w), 1862 (s) cm-1.

**Hydrogenations of 3-Pentanone in CD2Cl2.** Hydrogenations of 3-pentanone were performed in CD2Cl2 in 5 mm NMR tubes equipped with a J. Young valve, following a procedure described previously.6

**Hydrogenations of Neat 3-Pentanone (30 mM catalyst, at least 100 mL of H2 at 4 atm).** A series of hydrogenations of neat 3-pentanone were performed in glass tubes under H2. These reactions were run at 23°C, 50°C and 75°C. The catalysts were formed *in situ* by placing HMo(CO)2[5:1-C5H4(CH2)nPR2] (n = 2, R = Ph, Cy, tBu and n = 3, R = Ph; 2.1 x 10-5 mol, 1 equiv) and Ph3C+A- (A = BAr'4 –, BF4 – or PF6 –; 2.1 x 10-5 mol; 1 equiv) in a small vial, and adding 3-pentanone (630 L, 537 mg, 6.24 mmol, 283 equiv). After all the solids had dissolved, the reaction solution was transferred to a 125 mL glass bulb with a teflon valve. The solution was removed from the drybox, connected to a vacuum line, an freeze-pump-thawed two times. The sample was frozen a third time and the whole tube was submersed in liquid N2. The tube was then filled with 1 atm H2, sealed, and warmed to room temperature. The resulting tube contained about 4 atm H2 (125 mL at 4.1 atm, 20.1 mmol, 1000 equiv.) at room temperature. The tube was warmed to the appropriate temperature. Samples were generally taken at 10 days. Reactions using isolated precatalyst such as Mo(CO)2[5:1-C5H4(CH2)2PCy2](OTf) were prepared by dissolving the isolated complexes in 3-pentanone; all other conditions were identical.

The samples were removed by cooling to solution to 77K and flowing H2 over the solution. The tube was then warmed to room temperature, and a 60 L aliquot was removed. All manipulations took place under 1 atm hydrogen. After sampling, the tube was once again cooled with liquid nitrogen and evacuated. The tube was then filled with 1.1 atm H2 at 77 K, sealed, and placed back in the constant temperature bath. The aliquot (60 L) was dissolved in 500 L CD2Cl2 (in the air) in an NMR tube for analysis.

High pressure reactions were performed in a stainless steel Parr micro reactor (100 mL).

# References

1M. S. Kralik, A. L. Rheingold, J. P. Hutchinson, J. W. Freeman, and R. D. Ernst, *Organometallics*, 1996, **15**, 551-561.

2S. R. Bahr and P. Boudjouk, *J. Org. Chem.*, 1992, **57**, 5545-5547.

3R. A. Bartsch and J. G. Lee, *J. Org. Chem.*, 1991, **56**, 2579-2582.

4R. T. Kettenbach, W. Bonrath, and H. Butenschön, *Chem. Ber.*, 1993, **126**, 1657-1669.

5H. Butenschön, *Chem. Rev.*, 2000, **100**, 1527-1564.

6R. M. Bullock and M. H. Voges, *J. Am. Chem. Soc.*, 2000, **122**, 12594-12595; M. H. Voges and R. M. Bullock, *J. Chem. Soc., Dalton Trans.*, 2002, 759-770.
